# Supplementary material for: Evaluation of Human Cerebrospinal Fluid Malate Dehydrogenase 1 as a Marker in Genetic Prion Disease Patients
Source: PubMed Central journal article supplement (PMC6995564; doi:10.3390/biom9120800), 2019-11-28
Supplement: biomolecules-09-00800-s001.pdf [file biomolecules-09-00800-s001.pdf]

Supplementary Materials

# Evaluation of Human Cerebrospinal Fluid Malate Dehydrogenase 1 as a Marker in Genetic Prion Disease Patients

Inga Zerr <sup>1,2,\*†</sup>, Anna Villar-Piqué <sup>3,4,\*†</sup>, Vanda Edit Schmitz <sup>1</sup>, Anna Poggi <sup>5</sup>, Maurizio Pocchiari <sup>5</sup>, Raquel Sánchez-Valle <sup>6</sup>, Miguel Calero <sup>4,7</sup>, Olga Calero <sup>4</sup>, Inês Baldeiras <sup>8</sup>, Isabel Santana <sup>8</sup>, Gabor G. Kovacs <sup>10,11</sup>, Franc Llorens <sup>1,3,4,\*†</sup> and Matthias Schmitz <sup>1,2,\*†</sup>

<sup>1</sup> Department of Neurology, National Reference Center for CJD Surveillance University Medical Center Göttingen and German Center for Neurodegenerative Diseases (DZNE)—Göttingen campus, 37075 Göttingen, Germany

<sup>3</sup> Bellvitge Biomedical Research Institute (IDIBELL), 08908 Hospitalet de Llobregat, Spain.

<sup>4</sup> Network Center for Biomedical Research in Neurodegenerative Diseases, (CIBERNED), Instituto de Salud Carlos III, Madrid 28031, Spain

<sup>5</sup> Department of Neurosciences, Istituto Superiore di Sanità, 00161 Rome, Italy

<sup>6</sup> Alzheimer's Disease and Other Cognitive Disorders Unit. Neurology Department. Hospital Clinic. IDIBAPS. 08036 Barcelona, Spain

<sup>7</sup> Research Program on Digital Health, Chronicity and Healthcare Services (CROSADIS-UFIEC), Instituto de Salud Carlos III, Madrid 28220, Spain.

<sup>8</sup> Center for Neuroscience and Cell Biology, University of Coimbra; Faculty of Medicine, University of Coimbra, 3004-517 Coimbra, Portugal

<sup>9</sup> Neurology Department, CHUC—Centro Hospitalar e Universitário de Coimbra, CNC—Center for Neuroscience and Cell Biology, Faculty of Medicine, University of Coimbra, 3004-561 Coimbra, Portugal.

<sup>10</sup> Institute of Neurology, Medical University of Vienna, 1090 Vienna, Austria

<sup>11</sup> University of Toronto, Tanz Centre for Research in Neurodegenerative Disease, M5S 3H2 Toronto, Ontario, Canada

\* Correspondence: ingazerr@med.uni-goettingen.de (I.Z.); avillar@gwdg.com (A.V.-P.); franc.llorens@gmail.com (F.L.); matthias.schmitz@med.uni-goettingen.de (M.S.)

† These authors equally contributed to this work

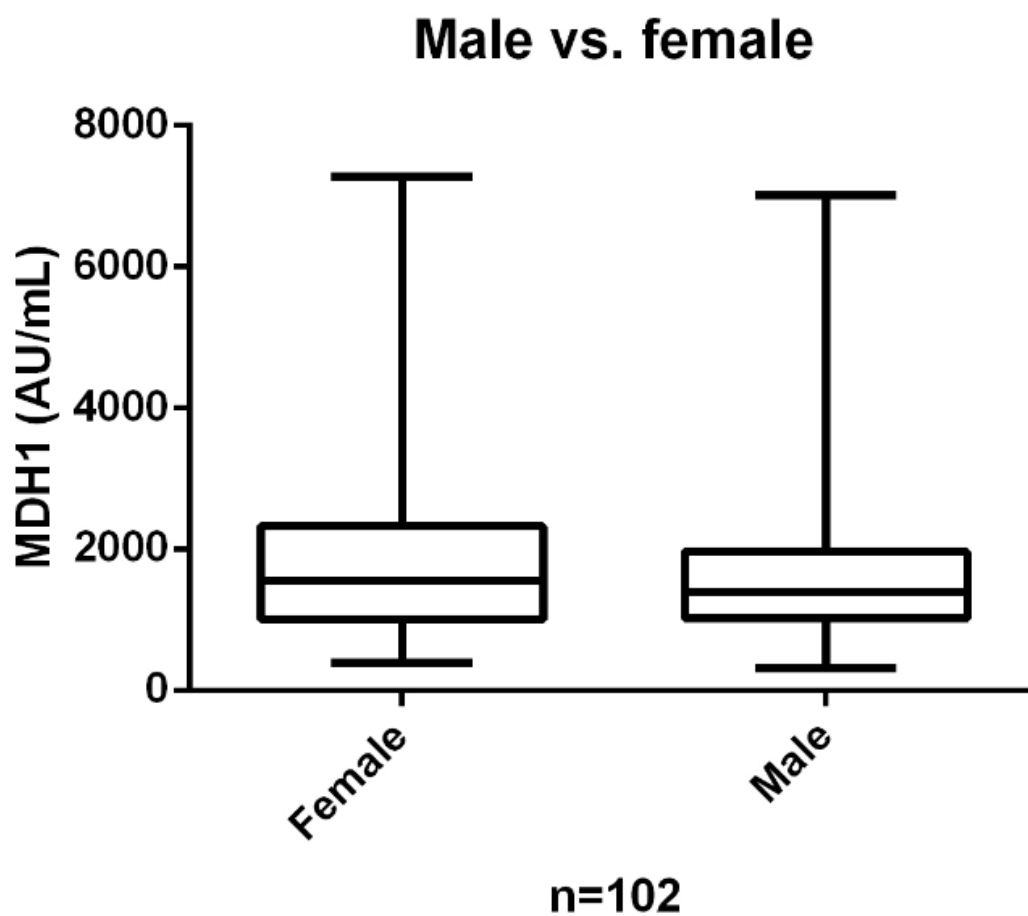

Figure S1. CSF MDH1 levels in females and males.
